# Supplementary material for: Beta vulgaris L.—A Source with a Great Potential in the Extraction of Natural Dyes Intended for the Sustainable Dyeing of Wool
Source: MDPI journal article supplement (doi:10.3390/plants12101933), 2023-05-09
Supplement: s1 [file s1]

# Supplementary material

## for

### *Beta vulgaris* L.—A Source with a Great Potential in the Extraction of Natural Dyes Intended for the Sustainable Dyeing of Wool

Vasilica Popescu <sup>1,\*</sup>, Alexandra Cristina Blaga <sup>2</sup>, Dan Cașcaval <sup>2</sup> and Andrei Popescu <sup>3</sup>

<sup>1</sup> Department of Chemical Engineering in Textiles and Leather, Faculty of Industrial Design and Business Management, “Gheorghe Asachi” Technical University of Iasi, 700050 Iasi, Romania

<sup>2</sup> Department of Organic, Biochemical and Food Engineering, “Cristofor Simionescu” Faculty of Chemical Engineering and Environmental Protection, “Gheorghe Asachi” Technical University of Iasi, 700050 Iasi, Romania; alexandra-cristina.blaga@academic.tuiasi.ro (A.C.B.); dan.cascaval@academic.tuiasi.ro (D.C.)

<sup>3</sup> Department of Mechanical Engineering, Mechatronics and Robotics, Faculty of Mechanical Engineering, “Gheorghe Asachi” Technical University of Iasi, 700050 Iasi, Romania; andrei.popescu@academic.tuiasi.ro

\* Correspondence: [vasilica.popescu@academic.tuiasi.ro](mailto:vasilica.popescu@academic.tuiasi.ro)

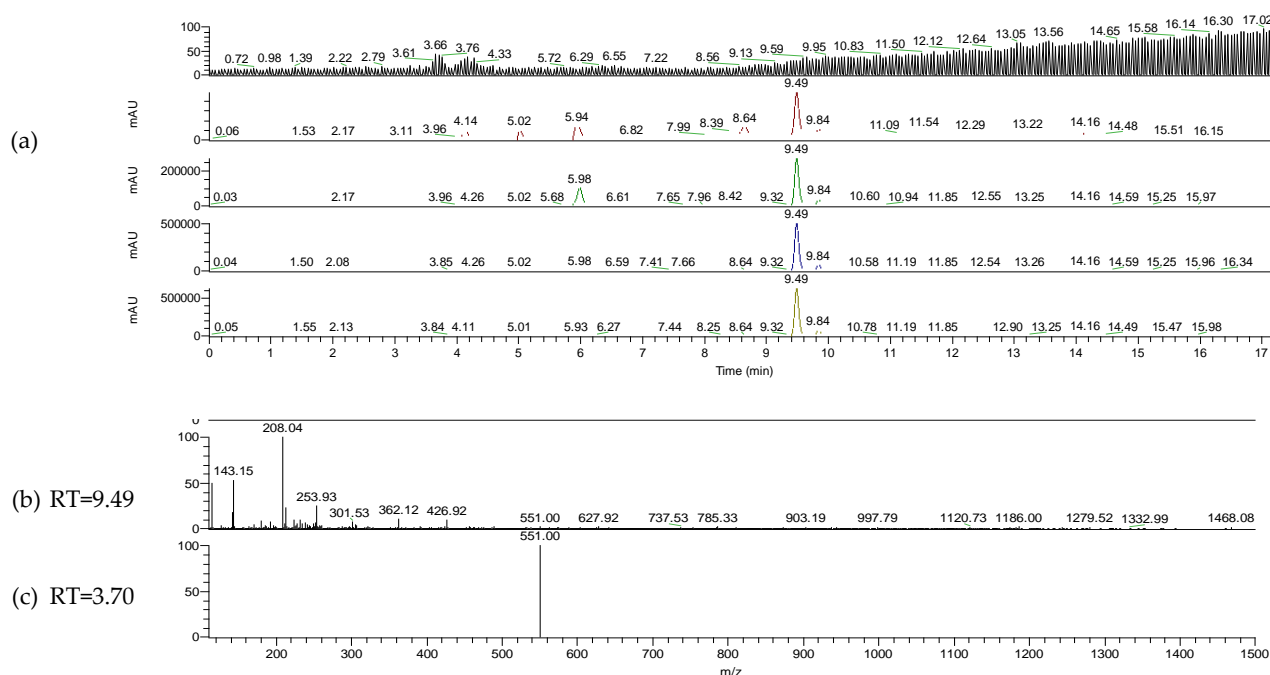

**Figure S1.** HPLC chromatogram (a) and mass spectra (b and c) of the compounds identified in the Rex1 extract.

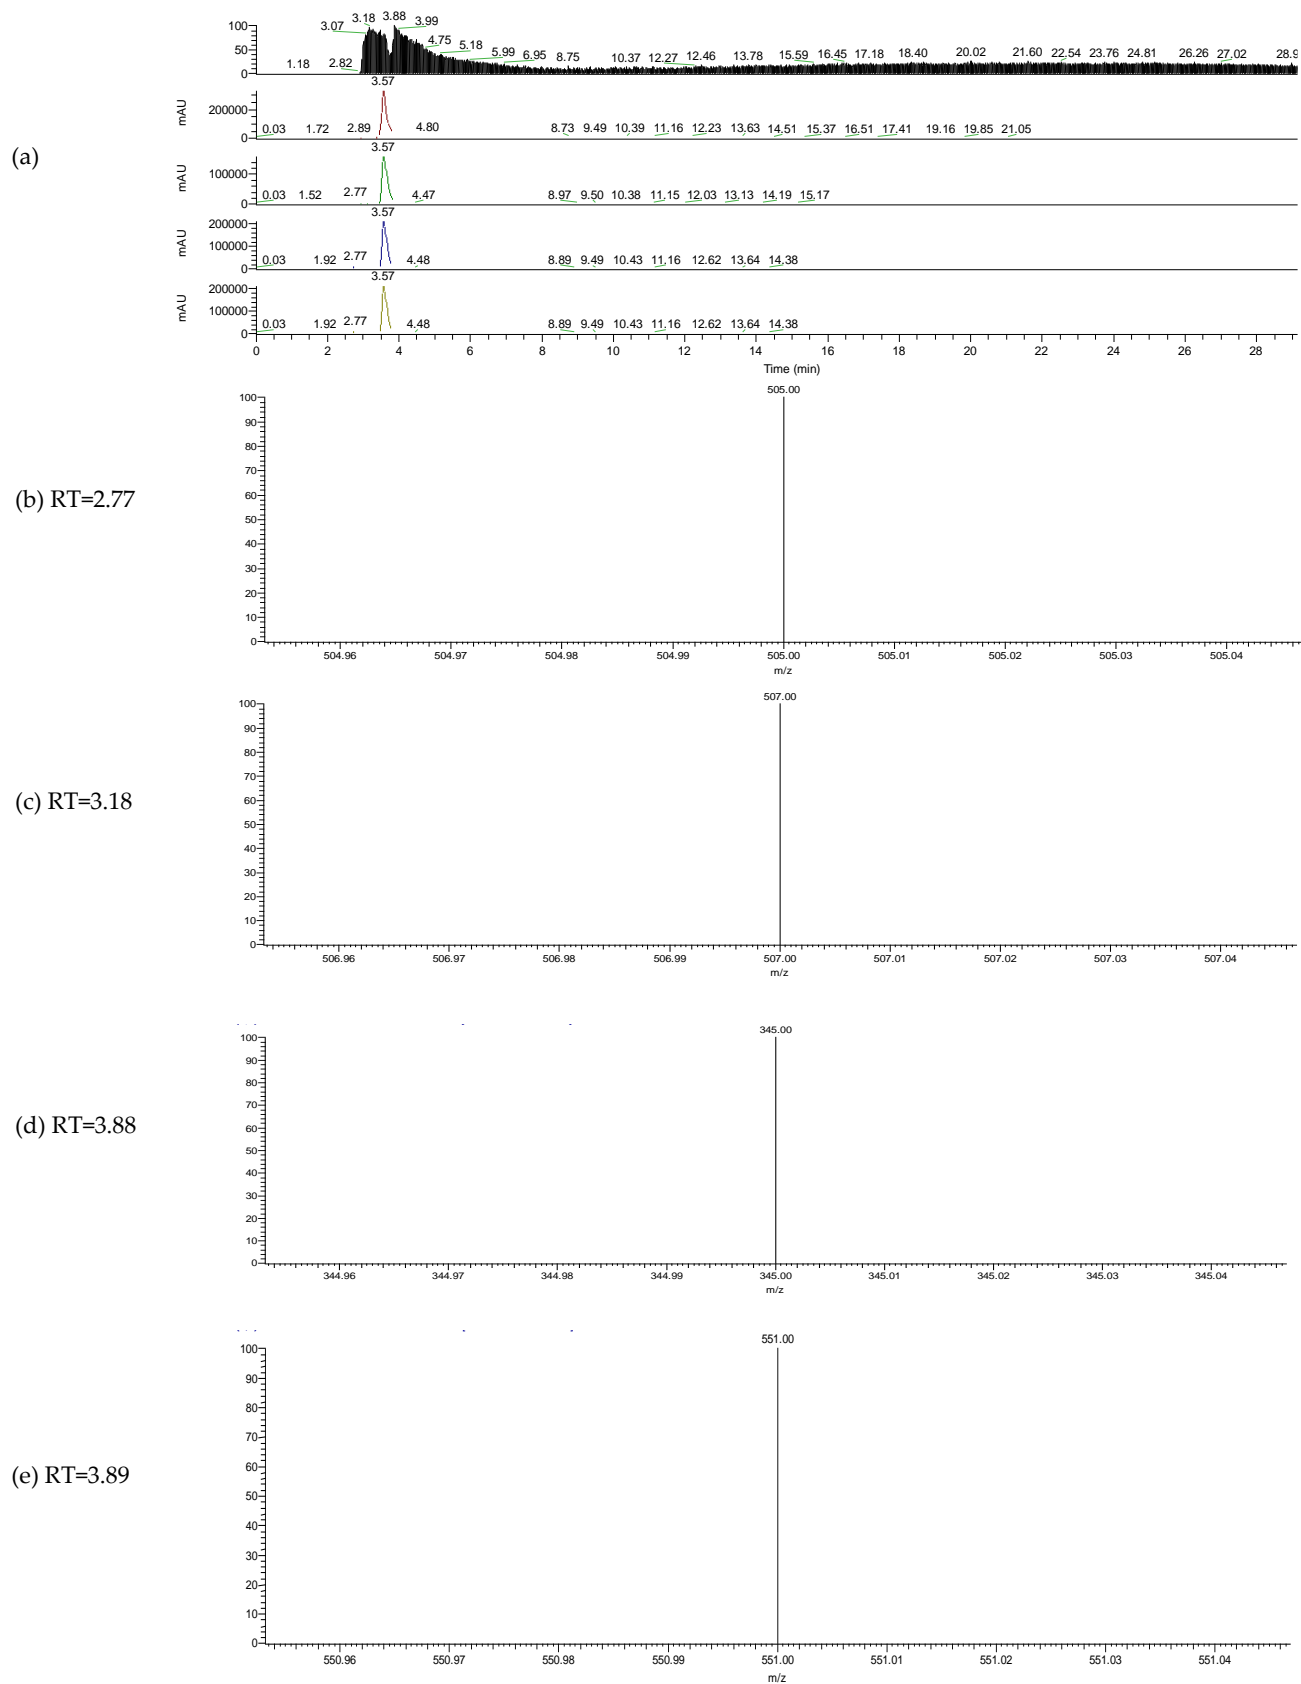

**Figure S2.** HPLC chromatogram (a) and mass spectra (b-e) of the compounds identified in the PresEx1 extract.
